# Supplementary material
Source: PubMed Central journal article supplement (PMC5688878)

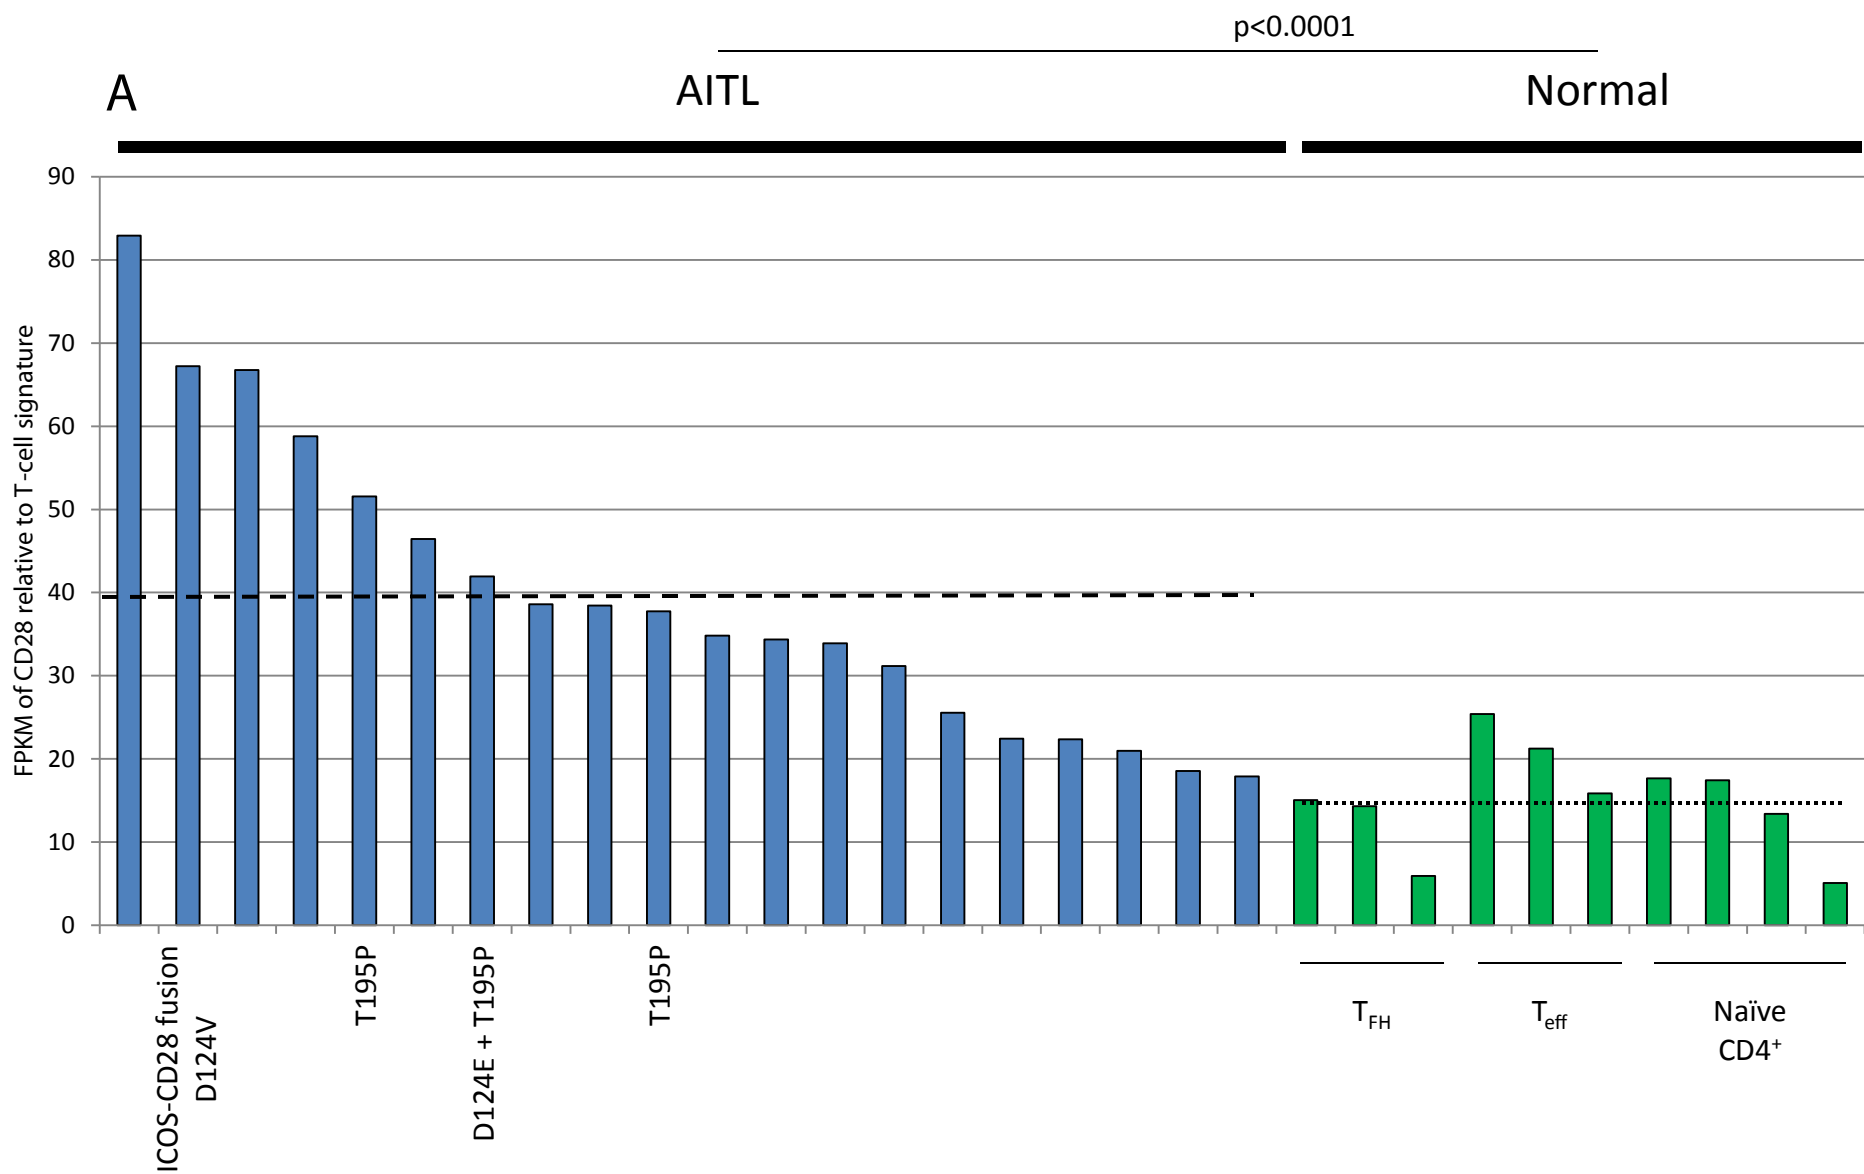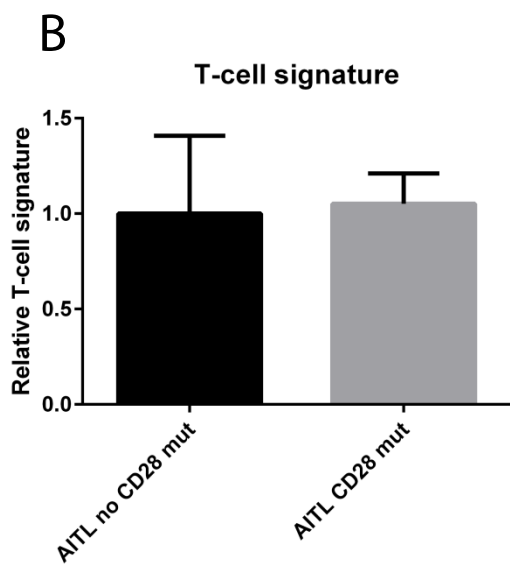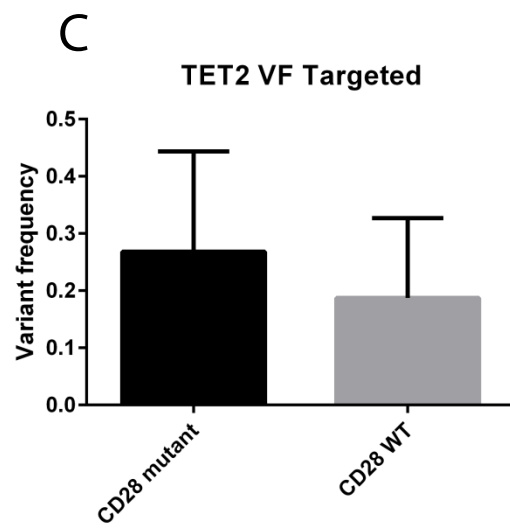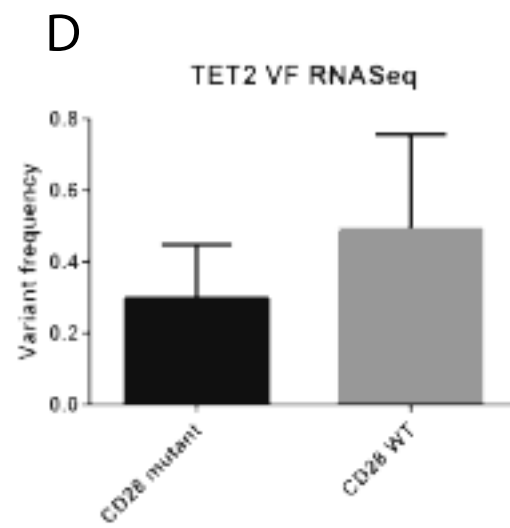

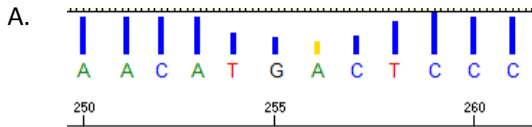

Case 089  
ACT>CCT  
p.T195P

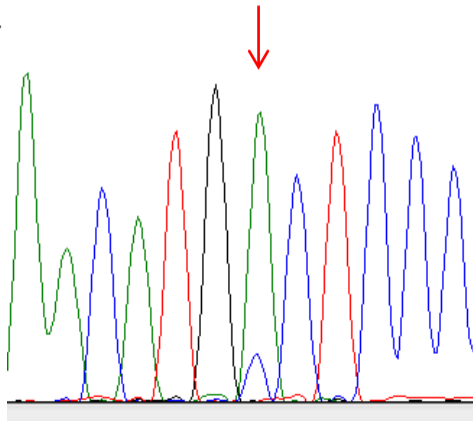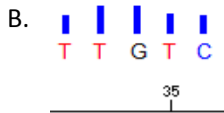

Case 086  
GAC>GAG  
p.D124E

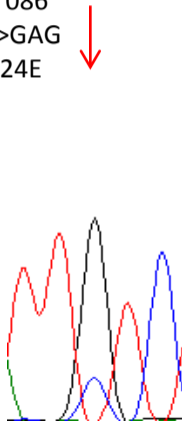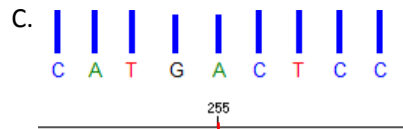

Case 086  
ACT>CCT  
p.T195P

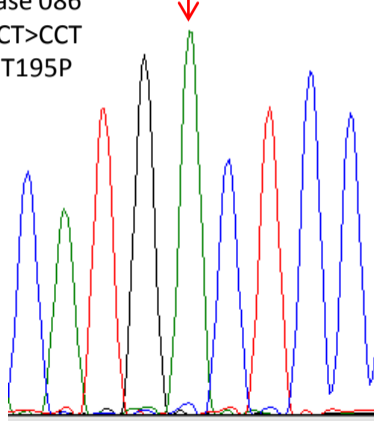



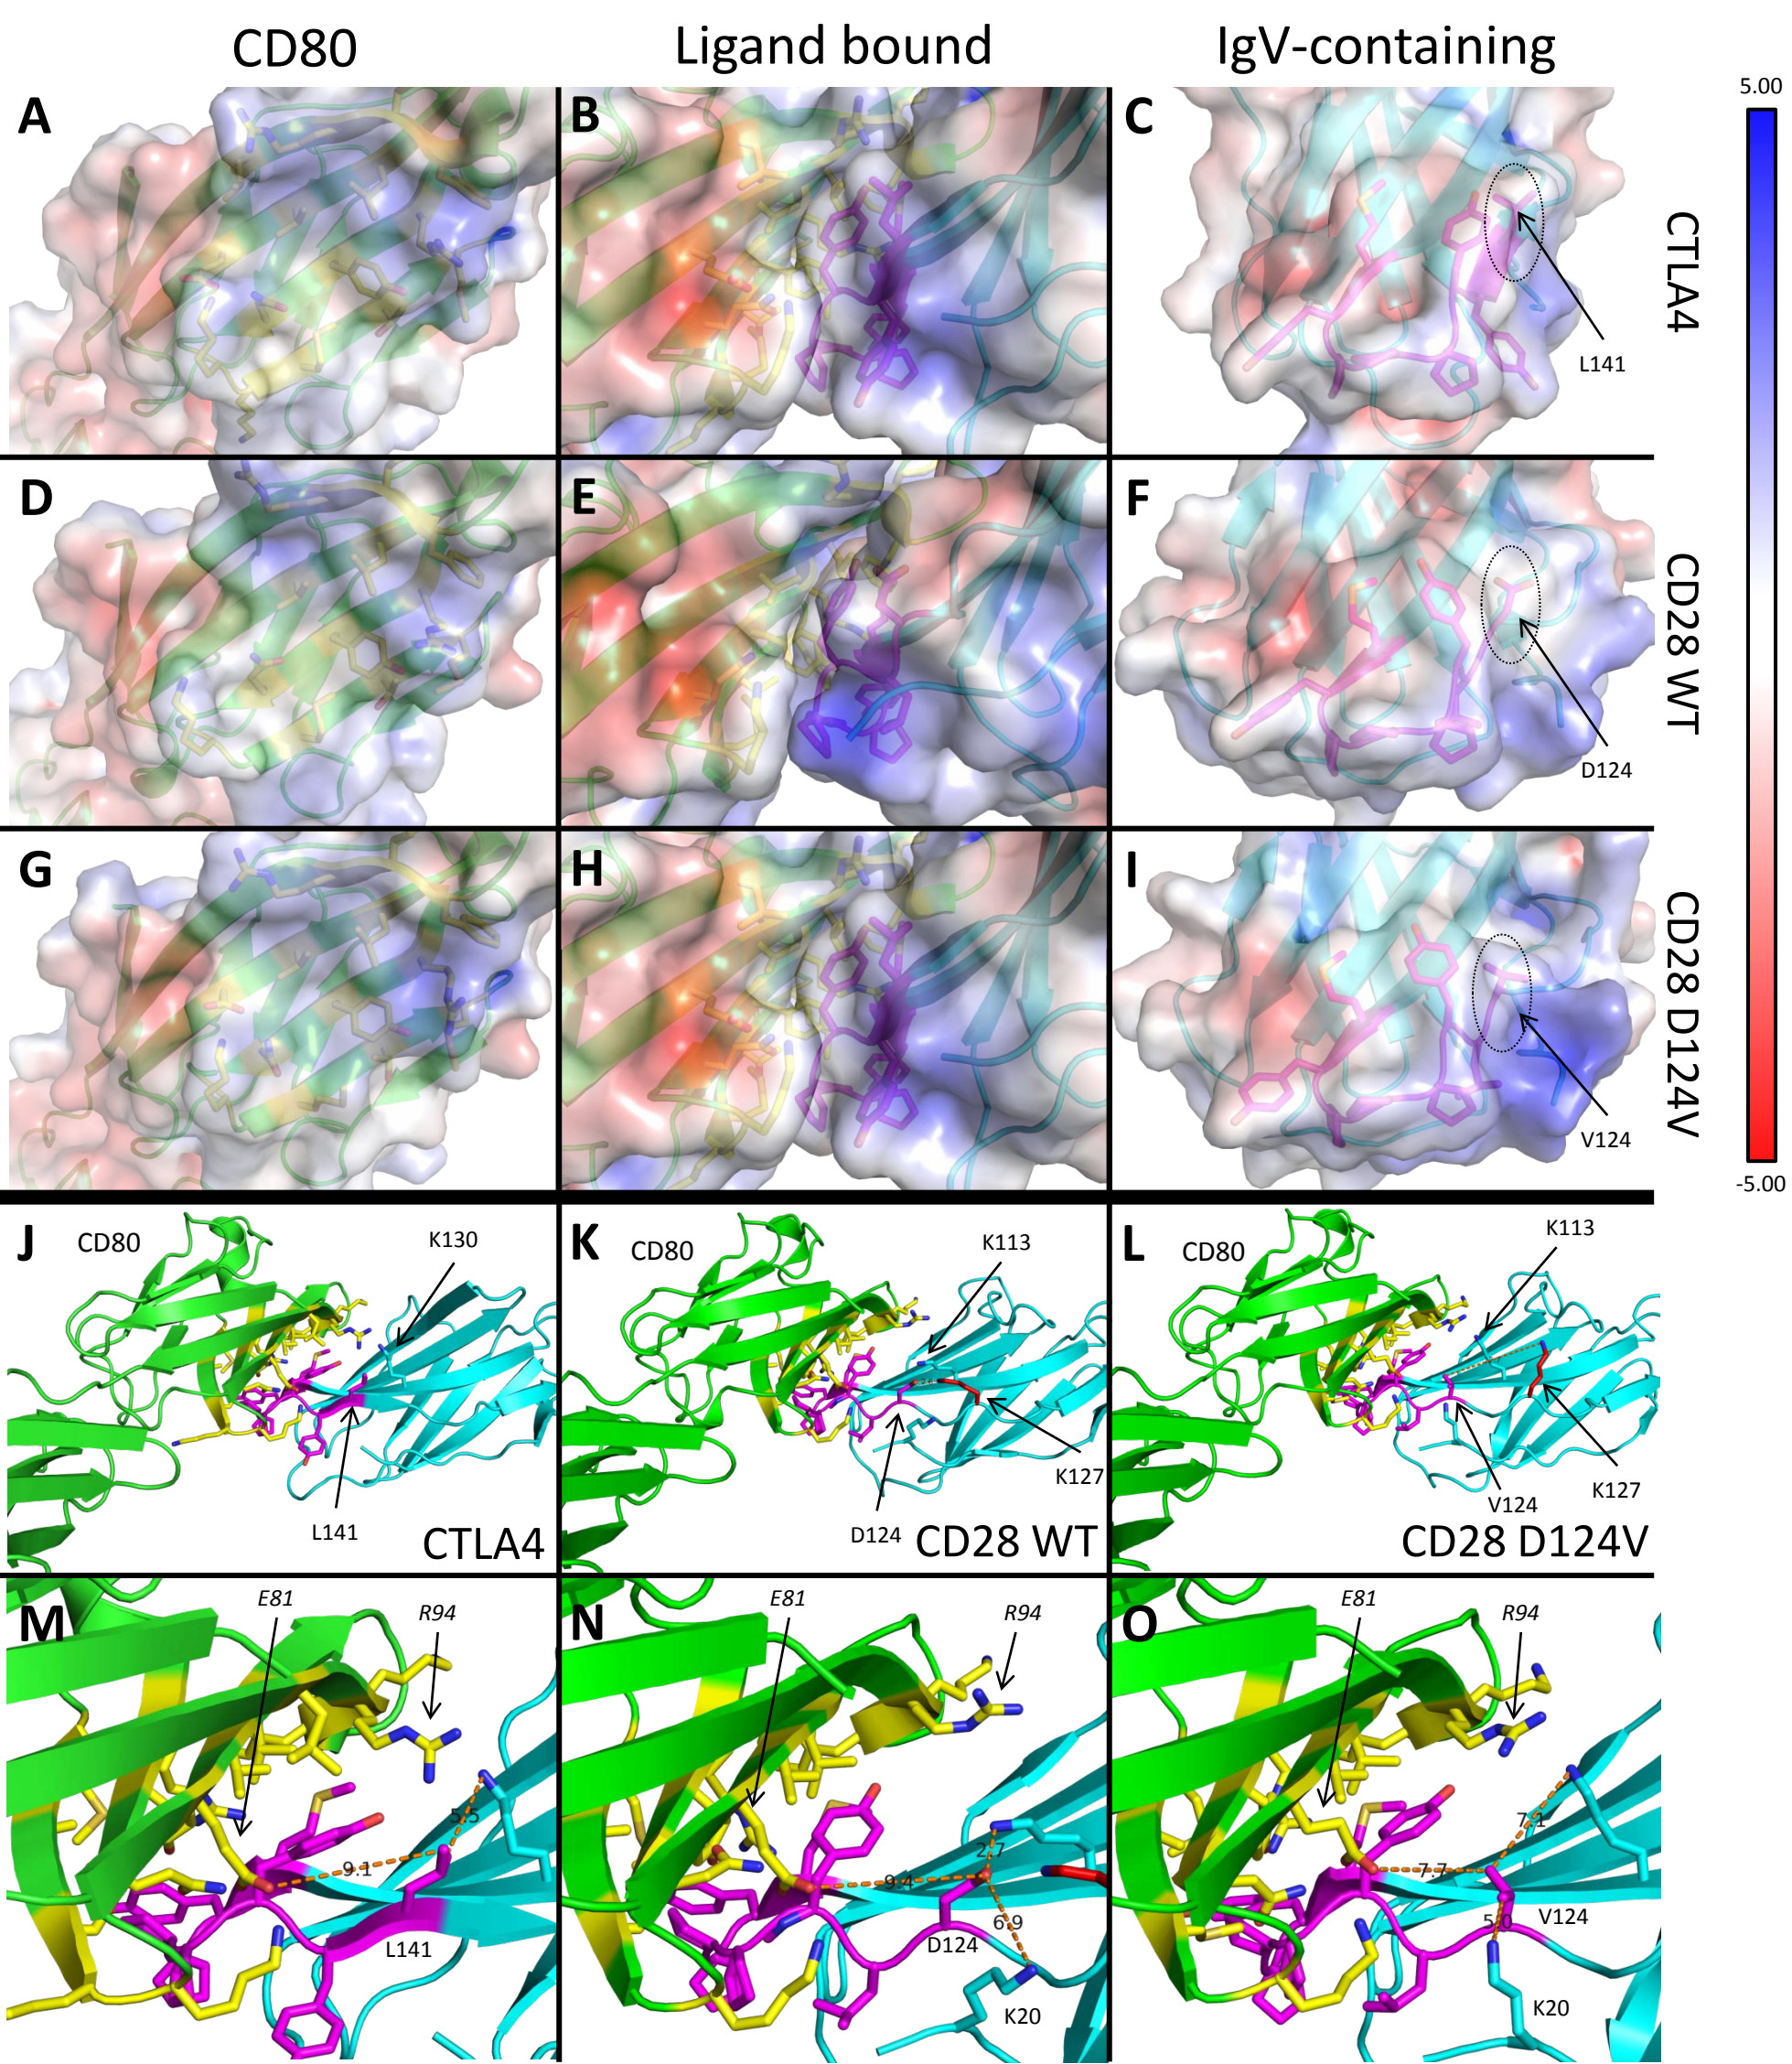

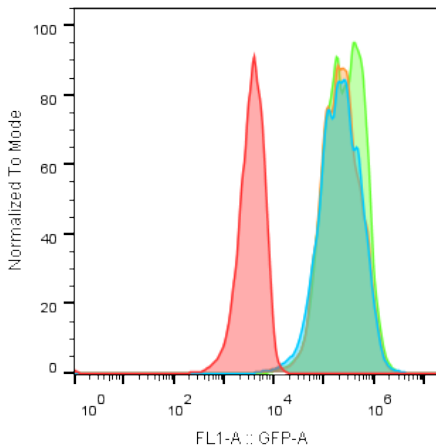

|   | SampleID         | Median : FL1-A |
|---|------------------|----------------|
| █ | Negative Control | 3582           |
| █ | CD28 WT          | 198883         |
| █ | CD28 D124V       | 200505         |
| █ | CD28 T195P       | 244655         |



CD28 mutant  
CD28 WT

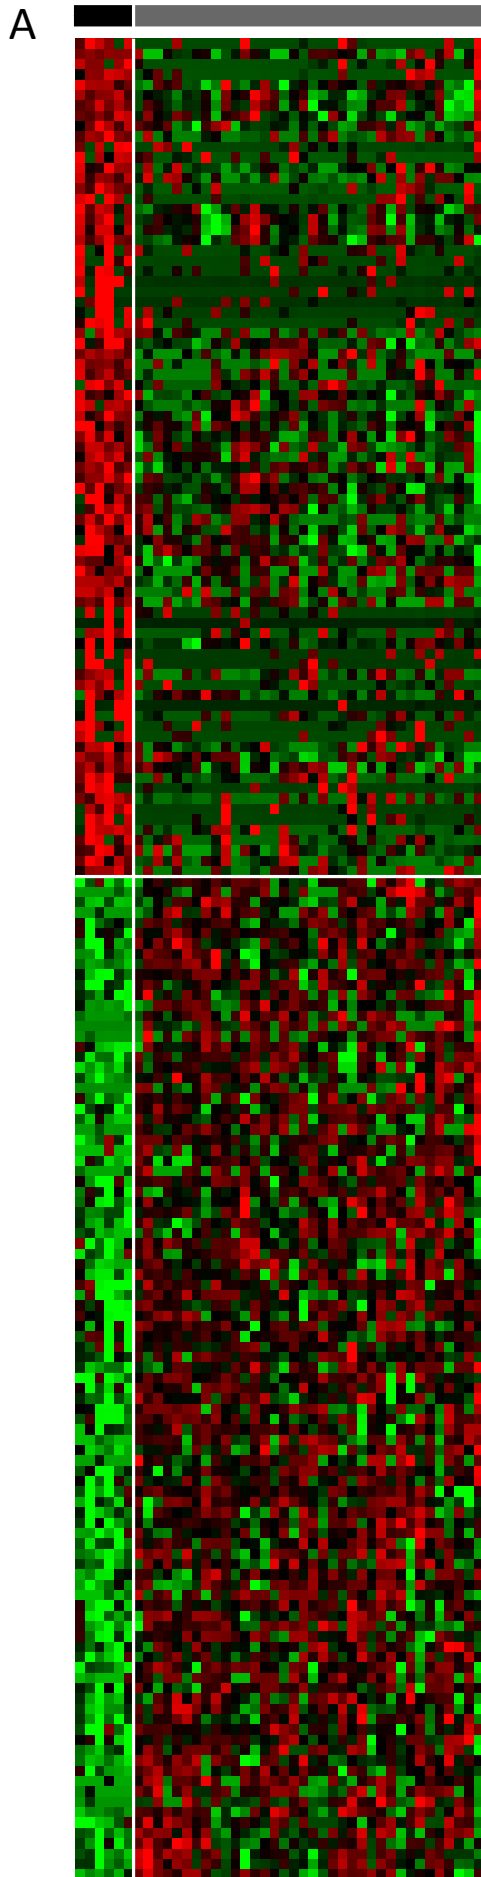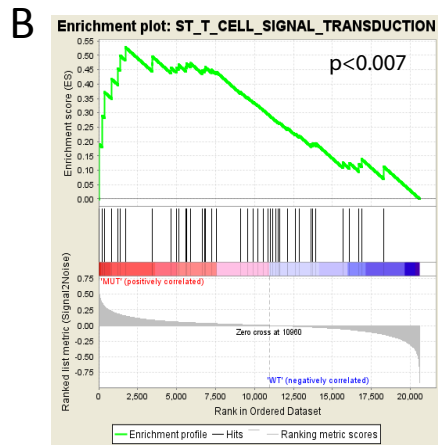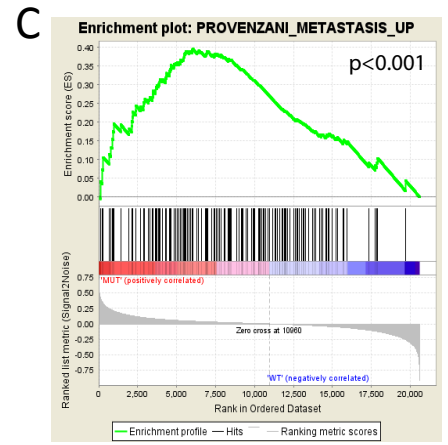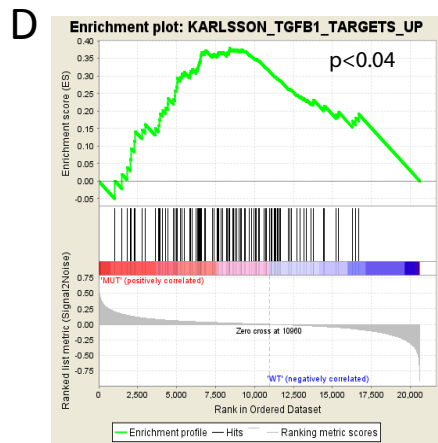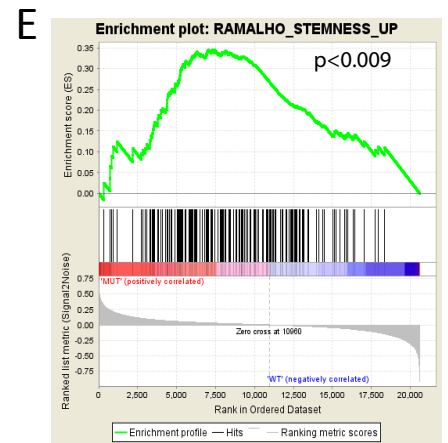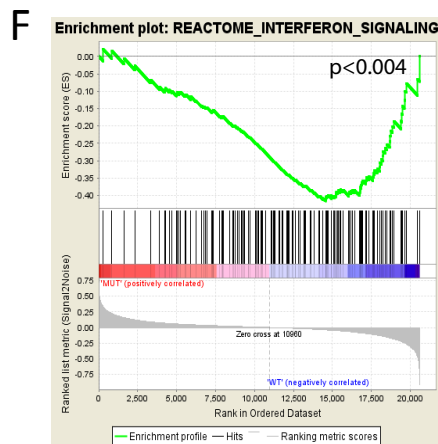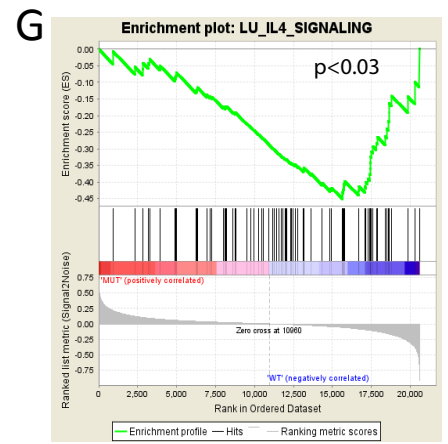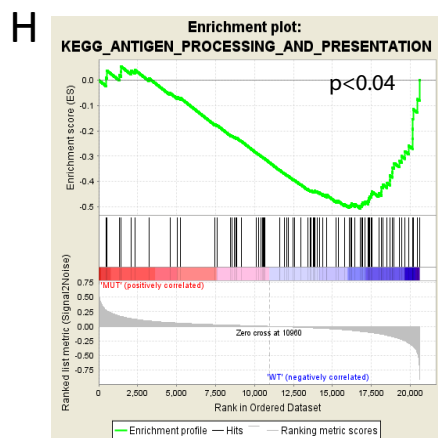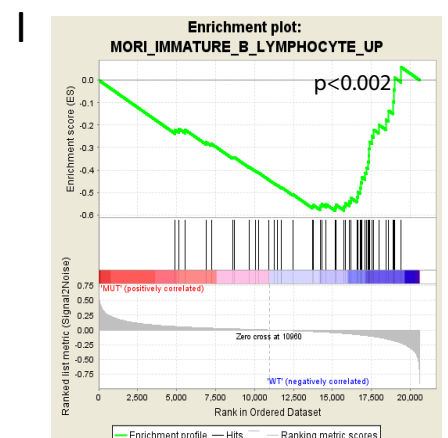

Supplement: NIHMS917191-supplement-Supplemental_Figures.pdf [file NIHMS917191-supplement-Supplemental_Figures.pdf]
